# Supplementary figures and images for: Regulation of X-linked gene expression during early mouse development by Rlim
Source: eLife journal article supplement (doi:10.7554/elife.19127), 2016-09-19

**A**

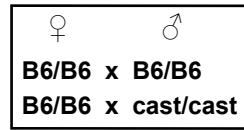

**B**

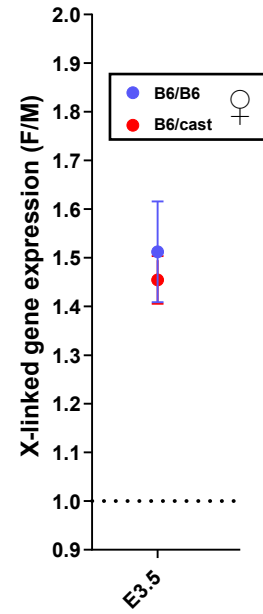

**C**

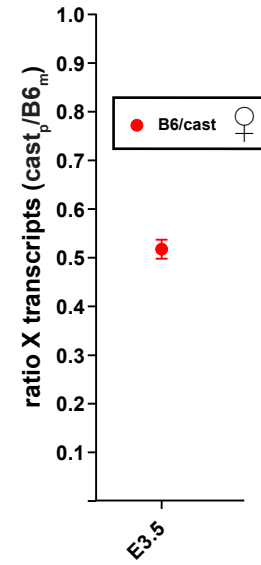

Supplement: supp [file elife-19127-supp-v1.zip]

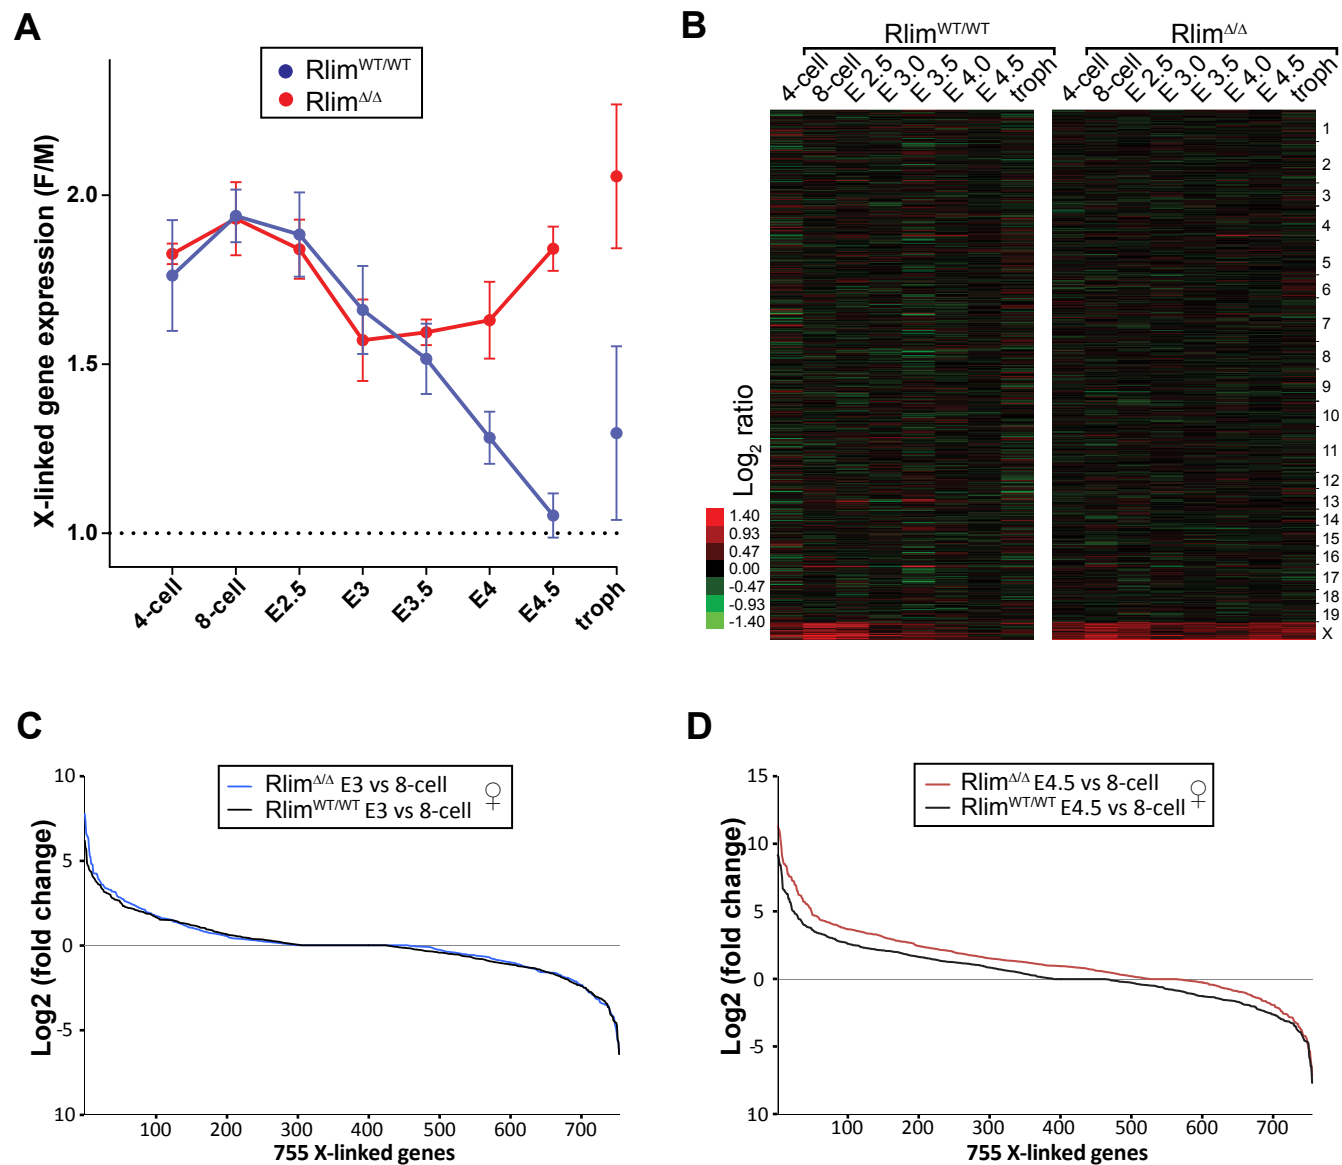

Supplement: supp [file elife-19127-supp-v1.zip]

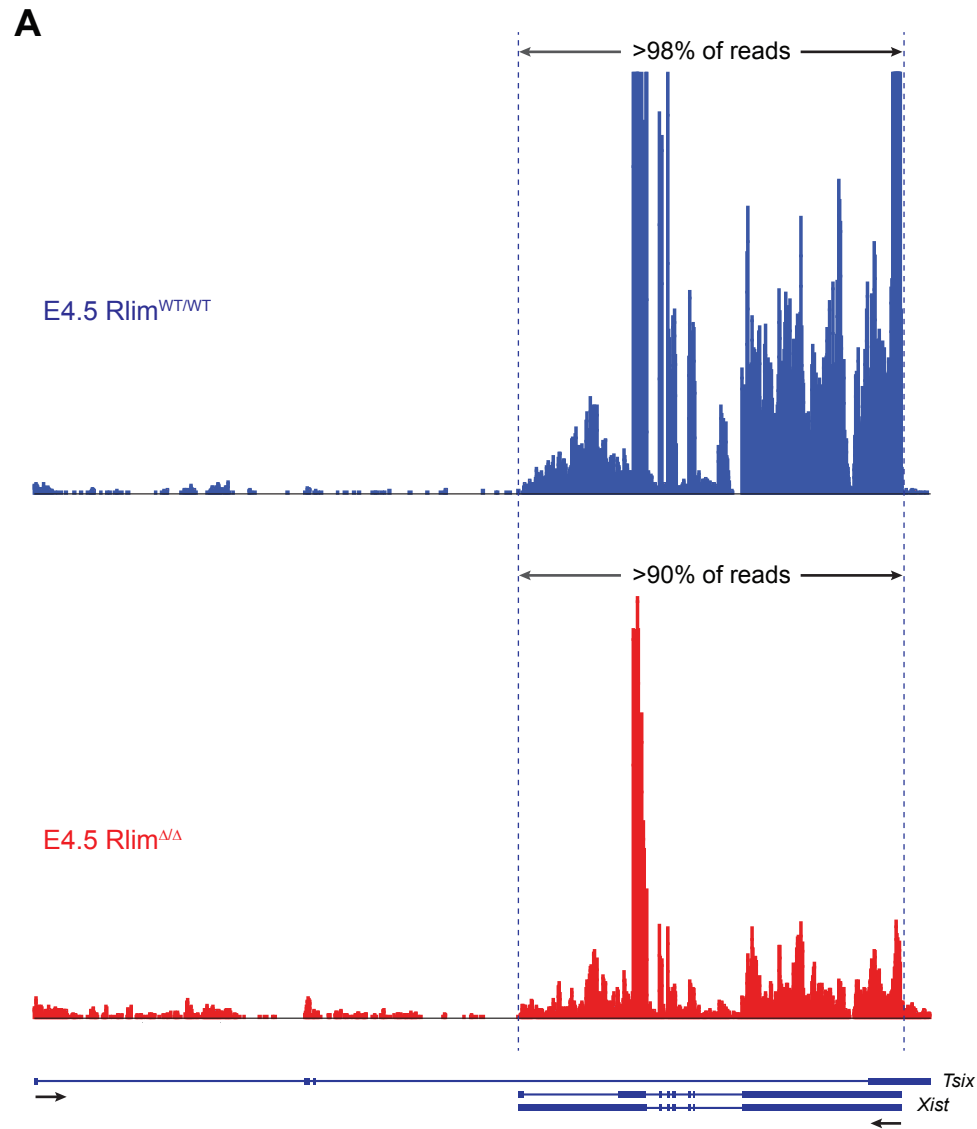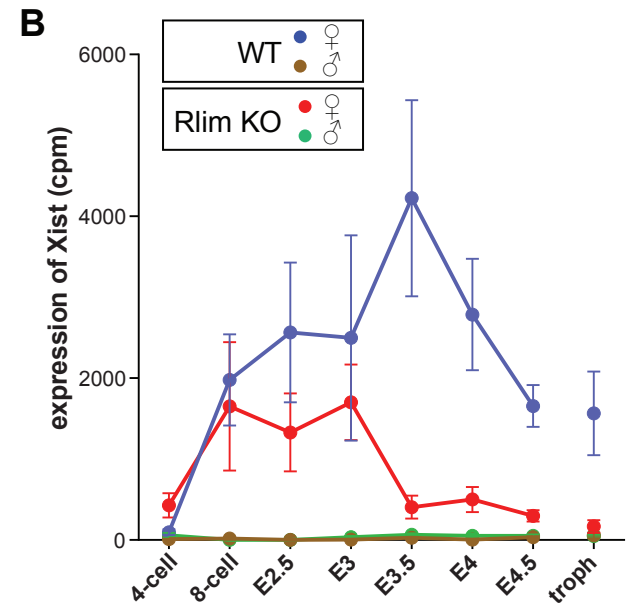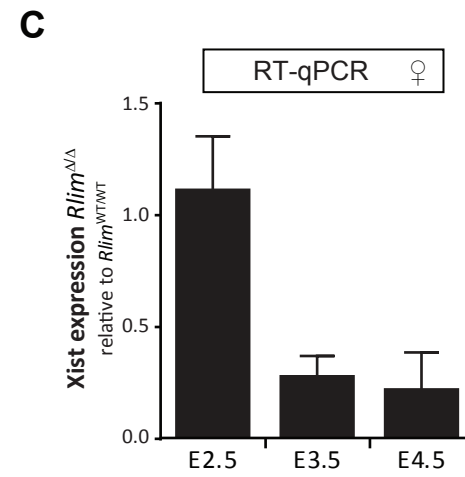

Supplement: supp [file elife-19127-supp-v1.zip]

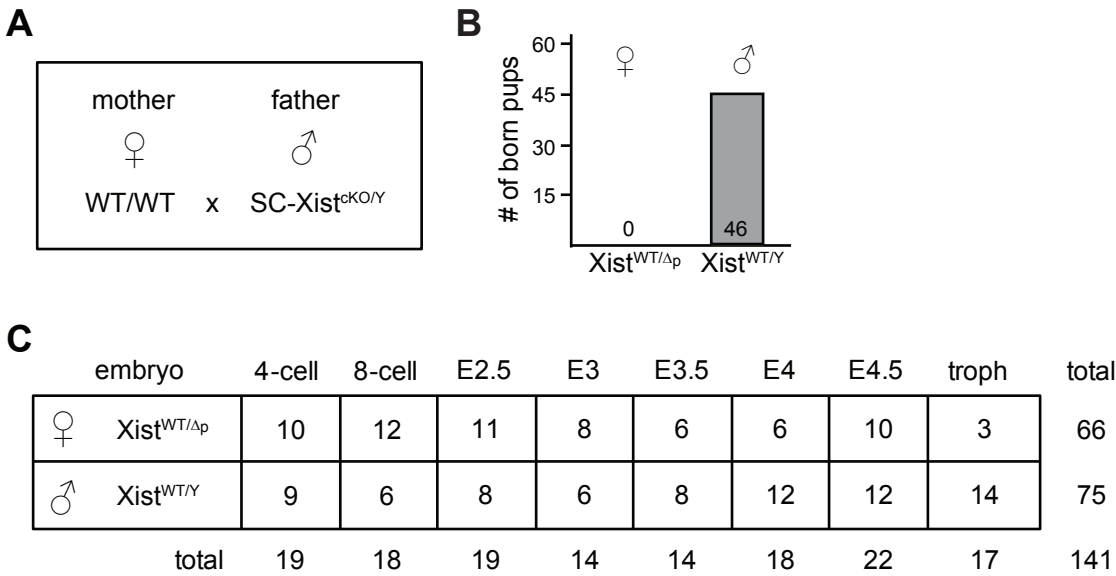

Supplement: supp [file elife-19127-supp-v1.zip]

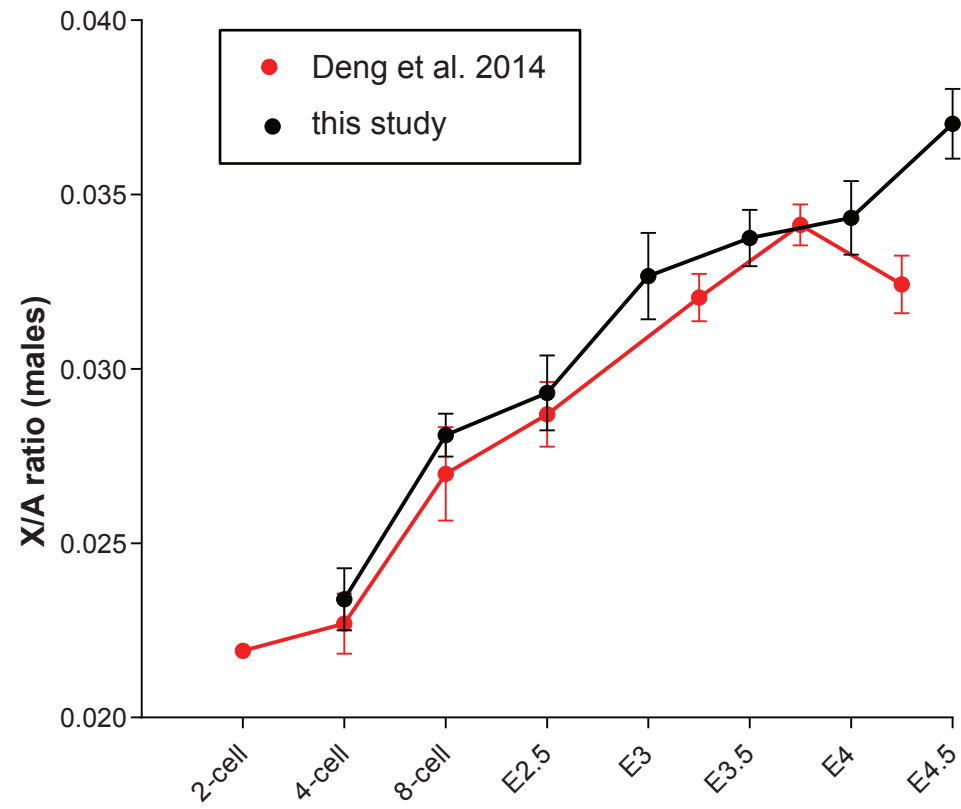

Supplement: supp [file elife-19127-supp-v1.zip]

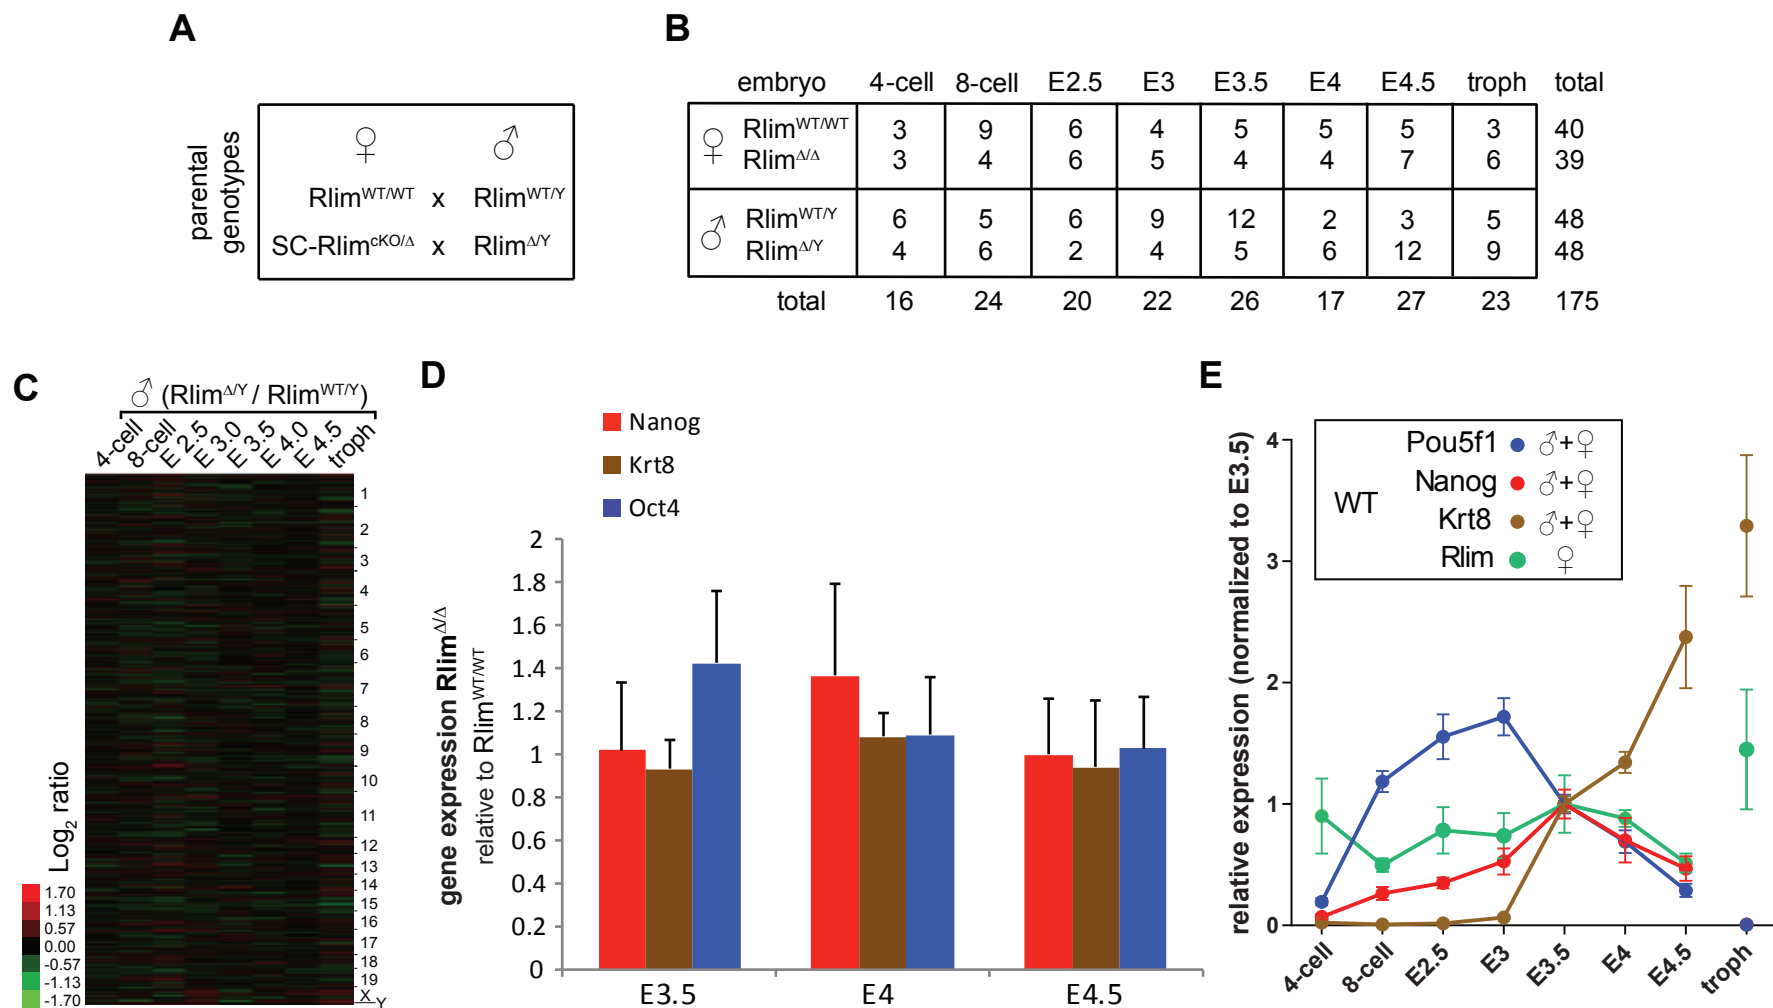

Supplement: supp [file elife-19127-supp-v1.zip]

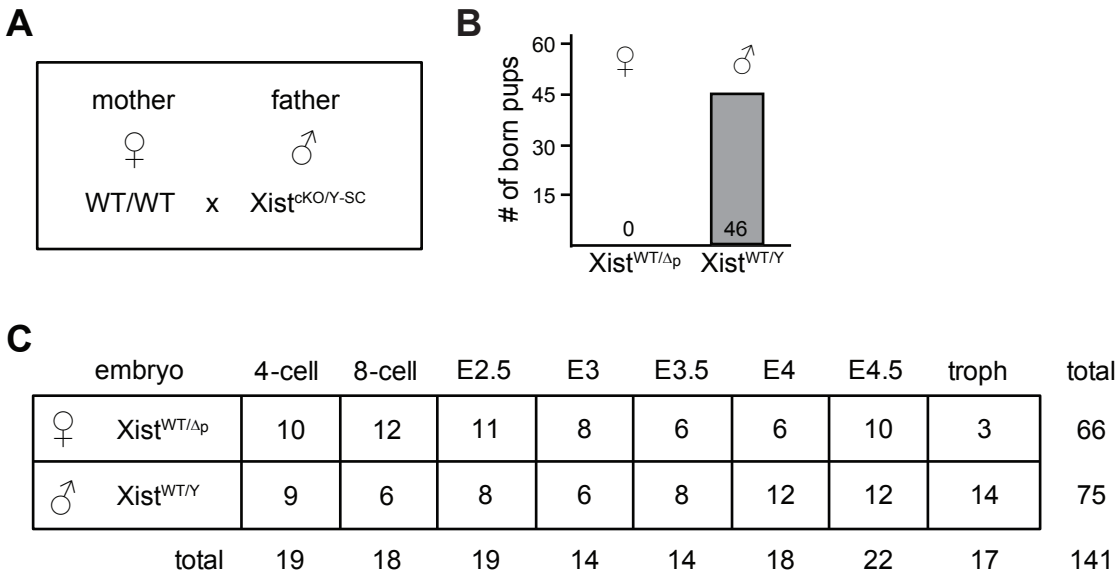

Supplement: supp [file elife-19127-supp-v4.zip]

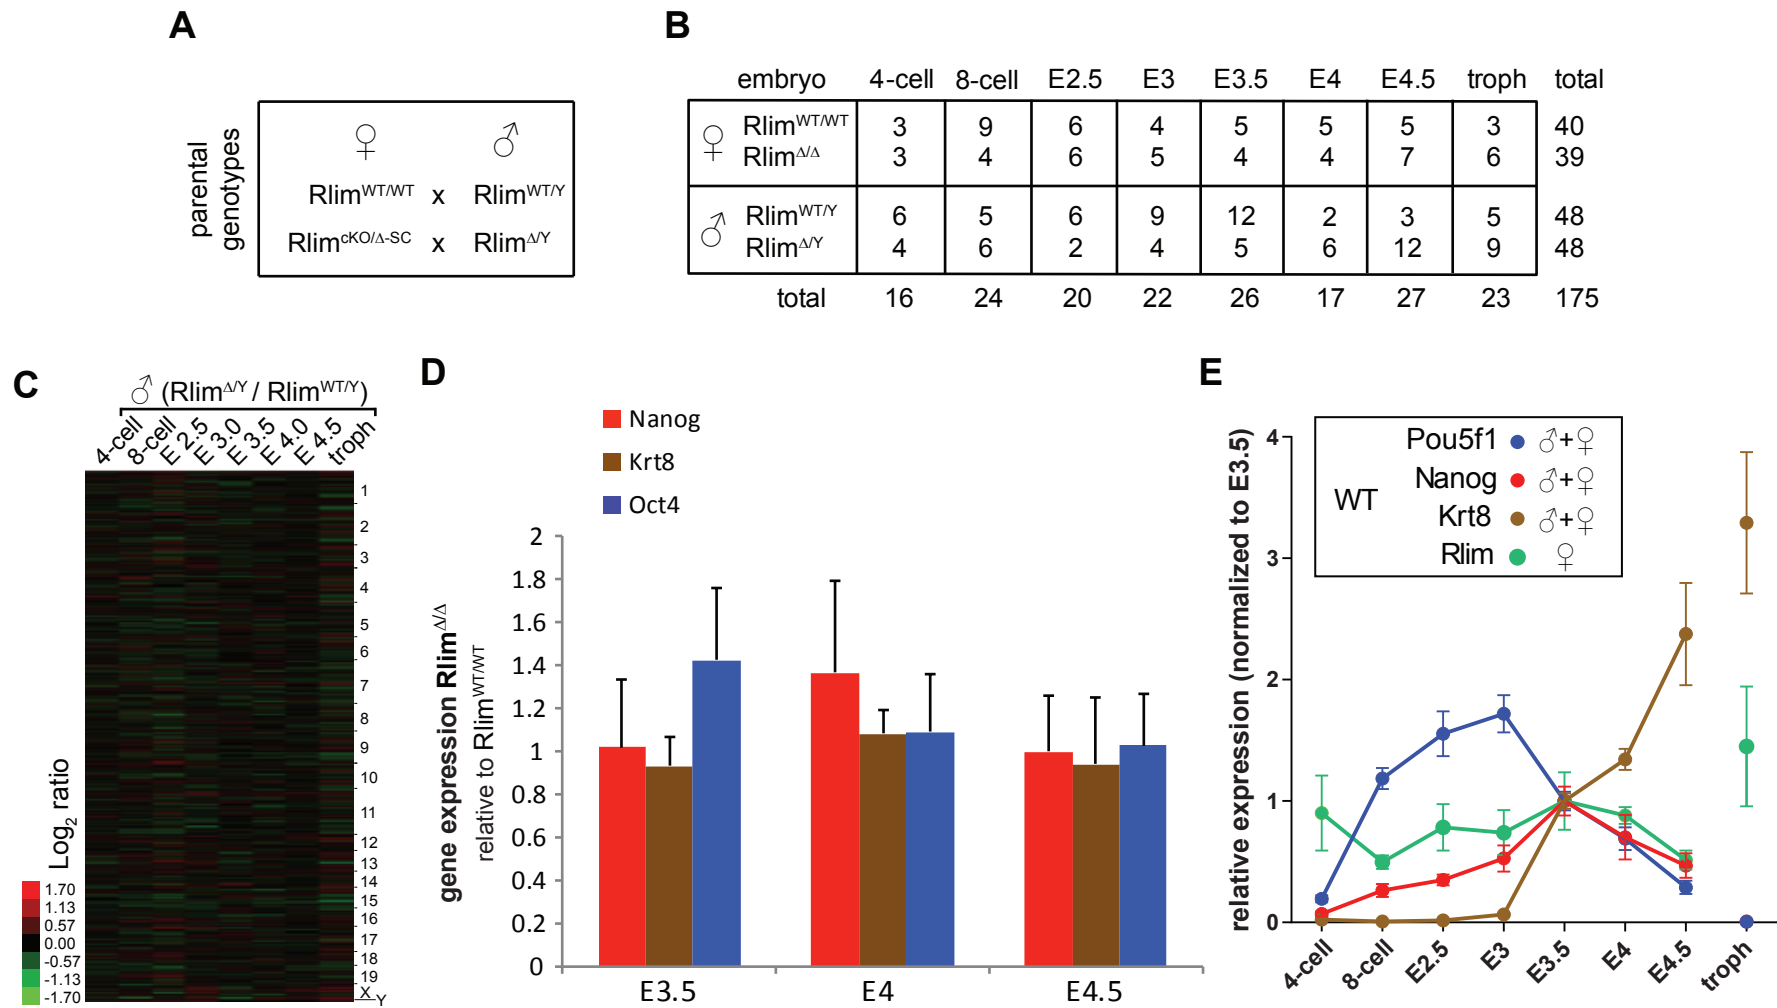

Supplement: supp [file elife-19127-supp-v4.zip]
